# Supplementary material for: Macrocyclic effect upon site-selective CuIIMII or MIICuII core formation with unsymmetric phenol-based macrocyclic ligands †
Source: Royal Society of Chemistry journal article supplement (doi:10.1039/b006605m), 2000-01-01
Supplement: b006605m.doc [file b006605m.doc]

**Supporting Information**

**Table S1.** Final atomic coordinates and equivalent isotropic thermal parameters of non-hydrogen atoms in [Cu(L2;4)]·2MeOH·H2O.

**atom** **x** **y** **z** **B(eq)**

Br(1) -0.35304(5) 0.31984(3) -0.4659(1) 5.01(3)

Br(2) -0.03217(5) -0.09200(3) -0.1933(1) 4.98(3)

Cu -0.27179(4) 0.05972(4) -0.4387(1) 2.88(2)

O(1) -0.2661(2) 0.1155(2) -0.5660(6) 2.7(1)

O(2) -0.1925(2) 0.0527(2) -0.4696(6) 3.4(1)

O(3) 0.2960(5) 0.1238(3) 0.6598(9) 11.6(3)

O(4) 1.0215(4) 0.2324(3) 0.147(1) 14.1(4)

O(5) 0.9107(3) 0.1513(2) 0.1018(7) 4.8(2)

N(1) -0.1566(3) 0.1962(2) -0.6729(7) 2.9(2)

N(2) -0.0818(3) 0.1184(2) -0.3924(7) 2.8(2)

N(3) -0.2797(3) -0.0100(2) -0.3783(7) 3.0(2)

N(4) -0.3382(3) 0.0875(2) -0.3344(7) 3.0(2)

C(1) -0.2856(3) 0.1594(3) -0.542(1) 2.7(2)

C(2) -0.3306(3) 0.1688(3) -0.441(1) 2.8(2)

C(3) -0.3507(4) 0.2168(3) -0.420(1) 3.4(2)

C(4) -0.3268(4) 0.2546(3) -0.501(1) 3.4(2)

C(5) -0.2834(3) 0.2466(3) -0.601(1) 2.8(2)

C(6) -0.2624(3) 0.2000(3) -0.6235(8) 2.7(2)

C(7) -0.2150(4) 0.1914(3) -0.7314(9) 2.9(2)

C(8) -0.1426(3) 0.2475(3) -0.640(1) 3.9(2)

C(9) -0.1482(3) 0.1654(3) -0.541(1) 2.9(2)

C(10) -0.0878(4) 0.1616(3) -0.489(1) 3.4(2)

C(11) -0.0326(4) 0.1226(3) -0.296(1) 4.8(3)

C(12) -0.0774(3) 0.0736(3) -0.486(1) 3.0(2)

C(13) -0.1586(4) 0.0207(3) -0.4057(9) 2.6(2)

C(14) -0.0992(4) 0.0286(3) -0.410(1) 2.8(2)

C(15) -0.0637(3) -0.0056(3) -0.349(1) 3.1(2)

C(16) -0.0836(4) -0.0474(3) -0.285(1) 3.3(2)

C(17) -0.1401(4) -0.0573(3) -0.279(1) 3.1(2)

C(18) -0.1783(4) -0.0230(3) -0.340(1) 2.8(2)

C(19) -0.2368(4) -0.0358(3) -0.338(1) 3.4(2)

C(20) -0.3351(4) -0.0369(3) -0.374(1) 4.1(3)

C(21) -0.3861(4) -0.0085(3) -0.426(1) 4.6(3)

C(22) -0.4117(4) 0.0240(3) -0.306(1) 4.4(3)

C(23) -0.3696(4) 0.0572(3) -0.227(1) 4.1(3)

C(24) -0.3539(4) 0.1319(3) -0.349(1) 3.3(2)

C(25) 0.3499(3) 0.1245(3) 0.650(1) 1.6(2)

C(26) 0.9971(5) 0.2133(4) 0.017(1) 6.5(3)

**Table 2.** Final atomic coordinates and equivalent isotropic thermal parameters of non-hydrogen atoms for [NiCu(L2;2)Cl2] (**7'**).

**atom** **x** **y** **z** **B(eq)**

Br(1) 0.4352(1) 0.3310(2) 0.29489(7) 4.30(4)

Br(2) 0.4355(1) 0.1656(2) 0.95171(7) 4.21(4)

Cu 0.6407(1) 0.2366(2) 0.62526(8) 2.80(4)

Ni 0.3810(1) 0.1475(2) 0.62024(8) 2.39(4)

Cl(1) 0.8336(3) 0.0992(4) 0.6267(2) 4.4(1)

Cl(2) 0.3230(3) 0.3445(4) 0.6432(2) 4.8(1)

O(1) 0.5216(7) 0.1797(8) 0.5630(4) 2.4(2)

O(2) 0.5322(7) 0.1398(8) 0.6770(4) 2.6(2)

N(1) 0.262(1) 0.095(1) 0.5492(5) 2.9(3)

N(2) 0.291(1) 0.025(1) 0.6764(5) 2.5(3)

N(3) 0.6977(8) 0.339(1) 0.6949(5) 2.6(3)

N(4) 0.692(1) 0.374(1) 0.5716(6) 3.2(3)

C(1) 0.503(1) 0.220(1) 0.5057(7) 2.6(3)

C(2) 0.566(1) 0.320(1) 0.4810(6) 3.0(3)

C(3) 0.545(1) 0.355(1) 0.4182(7) 3.7(4)

C(4) 0.461(1) 0.291(1) 0.3812(6) 3.0(4)

C(5) 0.394(1) 0.191(1) 0.4058(7) 3.2(4)

C(6) 0.411(1) 0.158(1) 0.4673(6) 2.7(3)

C(7) 0.340(1) 0.053(1) 0.4969(6) 2.9(3)

C(8) 0.173(1) 0.188(2) 0.5263(7) 5.0(5)

C(9) 0.190(1) -0.012(1) 0.5736(7) 3.9(4)

C(10) 0.257(1) -0.070(1) 0.6280(7) 3.8(4)

C(11) 0.180(1) 0.071(1) 0.7068(7) 4.2(4)

C(12) 0.375(1) -0.028(1) 0.7239(6) 2.8(3)

C(13) 0.515(1) 0.152(1) 0.7371(6) 2.3(3)

C(14) 0.432(1) 0.070(1) 0.7651(7) 2.5(3)

C(15) 0.411(1) 0.075(1) 0.8288(7) 2.9(4)

C(16) 0.467(1) 0.166(1) 0.8653(6) 3.1(3)

C(17) 0.548(1) 0.248(1) 0.8395(6) 2.7(3)

C(18) 0.572(1) 0.245(1) 0.7744(6) 2.8(3)

C(19) 0.659(1) 0.335(1) 0.7498(6) 3.1(3)

C(20) 0.795(1) 0.423(1) 0.6721(8) 3.9(4)

C(21) 0.770(1) 0.464(1) 0.6071(7) 4.2(4)

C(22) 0.653(1) 0.396(1) 0.5172(7) 2.9(4)

**Table 3.** Final atomic coordinates and equivalent isotropic thermal parameters of non-hydrogen atoms for [CuNi(L2;2)(dmf)](ClO4)2·MeOH (**16**).

**atom** **x** **y** **z** **B(eq)**

Br(1) -0.0052(2) 0.1695(1) 1.1429(2) 6.60(6)

Br(2) -0.1644(2) 0.4635(1) 0.0290(2) 6.17(6)

Cu -0.2114(2) 0.2631(1) 0.5253(2) 3.70(5)

Ni 0.0456(2) 0.3455(1) 0.6268(2) 3.80(5)

Cl(1) 0.3622(5) 0.4577(4) 0.2547(5) 5.3(1)

Cl(2) 0.4121(5) 0.1287(3) 0.8201(5) 5.9(2)

O(1) -0.0755(8) 0.3114(6) 0.696(1) 3.5(3)

O(2) -0.0991(9) 0.3516(6) 0.503(1) 4.2(3)

O(3) -0.101(1) 0.1571(7) 0.464(1) 6.2(3)

O(4) 0.322(2) 0.024(1) 0.221(2) 14.2(7)

O(5) 0.291(4) 0.417(2) 0.149(2) 31(1)

O(6) 0.292(3) 0.521(1) 0.291(3) 22(1)

O(7) 0.460(2) 0.483(2) 0.232(3) 25(1)

O(8) 0.363(2) 0.398(1) 0.316(2) 18(1)

O(9) 0.390(1) 0.172(1) 0.729(2) 12.5(7)

O(10) 0.530(2) 0.159(1) 0.903(2) 16.3(7)

O(11) 0.405(2) 0.042(1) 0.763(2) 18.6(9)

O(12) 0.321(2) 0.143(1) 0.880(2) 17(1)

N(1) -0.331(1) 0.2155(8) 0.599(1) 4.1(4)

N(2) -0.354(1) 0.2540(8) 0.364(1) 4.4(4)

N(3) 0.155(1) 0.3776(8) 0.544(1) 4.3(4)

N(4) 0.183(1) 0.3342(8) 0.751(1) 4.1(4)

N(5) 0.005(2) 0.0540(8) 0.373(1) 5.0(4)

C(1) -0.055(2) 0.276(1) 0.794(2) 3.7(5)

C(2) 0.065(2) 0.2741(9) 0.867(2) 3.7(5)

C(3) 0.081(2) 0.241(1) 0.973(2) 4.3(5)

C(4) -0.026(2) 0.212(1) 0.997(2) 4.3(5)

C(5) -0.144(2) 0.213(1) 0.923(2) 4.2(5)

C(6) -0.164(2) 0.247(1) 0.819(1) 3.6(5)

C(7) -0.291(2) 0.262(1) 0.750(1) 4.5(5)

C(8) -0.351(2) 0.119(1) 0.564(2) 5.5(5)

C(9) -0.456(2) 0.250(1) 0.537(2) 6.2(6)

C(10) -0.470(2) 0.232(1) 0.397(2) 6.3(6)

C(11) -0.350(2) 0.183(1) 0.234(2) 6.1(5)

C(12) -0.348(2) 0.343(1) 0.348(2) 5.2(5)

C(13) -0.114(2) 0.3758(9) 0.396(2) 3.6(5)

C(14) -0.233(2) 0.3700(9) 0.315(2) 3.8(5)

C(15) -0.249(2) 0.395(1) 0.204(2) 4.3(5)

C(16) -0.141(2) 0.425(1) 0.177(2) 4.8(5)

C(17) -0.023(2) 0.430(1) 0.254(2) 4.8(5)

C(18) -0.008(2) 0.403(1) 0.365(2) 4.4(5)

C(19) 0.118(2) 0.403(1) 0.439(2) 5.4(6)

C(20) 0.289(2) 0.365(1) 0.601(2) 6.6(6)

C(21) 0.305(1) 0.371(1) 0.740(2) 5.4(5)

C(22) 0.180(2) 0.304(1) 0.845(2) 4.5(5)

C(23) -0.095(2) 0.086(1) 0.380(2) 5.2(6)

C(24) 0.129(2) 0.102(1) 0.467(2) 8.7(7)

C(25) 0.006(2) -0.030(1) 0.270(2) 8.6(6)

C(26) 0.300(2) 0.029(2) 0.089(4) 15(1)
